# Supplementary material
Source: MDPI journal article supplement (https://www.mdpi.com/1424-2818/11/5/71)
Supplement: s1 [file s1]

lipid	status	fulton	lecren	somatic
9.44	adult	1.13	1.06	1.05
6.98	adult	1.14	1.04	1.06
7.4	adult	0.96	0.9	0.88
9.65	adult	1.17	1.14	1.09
5.58	adult	1.06	1.06	0.95
11.27	adult	1.24	1.18	1.17
5.78	adult	0.9	0.85	0.83
6.77	adult	0.87	0.82	0.8
8.38	adult	1.05	1.01	1
5.35	adult	1.05	0.98	0.97
5.97	adult	0.97	0.96	0.88
3.36	adult	0.79	0.74	0.72
3.95	adult	1.02	0.95	0.94
4.28	adult	1.09	1.04	1.01
4.71	adult	0.93	0.92	0.84
6.36	adult	0.89	0.89	0.81
5.07	adult	0.92	0.87	0.84
3.67	adult	0.87	0.86	0.76
5.12	adult	0.92	0.89	0.84
4.8	adult	0.8	0.75	0.76
4.41	adult	0.92	0.88	0.84
6.37	adult	0.94	0.88	0.88
5.45	adult	0.9	0.89	0.82
8.6	adult	1.04	0.96	0.99
5.04	adult	1.1	0.99	1.02
5.12	adult	0.99	0.94	0.92
4.31	adult	0.83	0.78	0.77
3.94	adult	0.92	0.82	0.85
7.67	adult	1.03	1.03	0.95
5.43	adult	1.1	1.01	1.01
2.37	adult	0.85	0.78	0.77
5.31	adult	0.96	0.91	0.89
2.78	adult	0.9	0.88	0.82
3.7	adult	0.99	0.9	0.91
5.65	adult	1	0.97	0.89
4.4	adult	0.93	0.91	0.86
5.02	adult	0.93	0.88	0.86
8.5	adult	1.22	1.1	1.15
7.02	adult	1.1	1	1.02
3.55	adult	0.83	0.81	0.78
7.83	adult	0.99	0.96	0.92
7.99	adult	1.09	0.99	1.02
4.7	adult	0.9	0.88	0.82
5.09	adult	0.95	0.92	0.86
4.13	adult	0.97	0.93	0.92
6.89	adult	1.2	1.13	1.1
6.43	adult	0.95	0.95	0.84
5.77	adult	0.89	0.86	0.82
4.61	adult	1	0.97	0.92
5.72	adult	1	0.95	0.93
5.4	adult	0.99	0.98	0.91
5.53	adult	1.08	1.06	0.99
3.38	adult	0.96	0.94	0.88
5.22	adult	1	0.96	0.94
6.24	adult	1.03	1.03	0.94
5.9	adult	1.19	1.1	1.11
6.45	adult	1.19	1.08	1.11
6.56	adult	0.97	0.89	0.89
6.21	adult	1	0.9	0.93
4.76	adult	0.83	0.75	0.76
3.96	adult	0.9	0.79	0.84
6.73	adult	1.04	0.97	0.97
6.58	adult	1	0.91	0.92
5.08	adult	1.12	1.02	1.05
3.37	adult	0.94	0.85	0.85
6.16	adult	1.12	1.09	1.02
4.24	adult	0.93	0.83	0.86
10.05	adult	1.16	1.09	1.08
6.8	juvenile	1.14	1.09	1.06
5.75	juvenile	0.97	0.92	0.88
4.65	juvenile	0.87	0.83	0.78
3.05	juvenile	0.82	0.75	0.71
2.97	juvenile	0.79	0.74	0.69
2.58	juvenile	0.94	0.9	0.85
1.96	juvenile	0.82	0.76	0.72
6.09	juvenile	0.93	0.89	0.85
5.04	juvenile	0.98	0.93	0.89
4.51	juvenile	1.03	0.96	0.93
5.1	juvenile	1.11	1.02	1
5.58	juvenile	1.09	1.02	0.99
6.56	juvenile	1.05	1	0.97
4.28	juvenile	0.97	0.92	0.89
6.19	juvenile	1.19	1.13	1.1
3.52	juvenile	1.05	0.98	0.95
4.57	juvenile	0.99	0.93	0.89
4.7	juvenile	0.95	0.9	0.86
3.58	juvenile	0.92	0.85	0.82
2.1	juvenile	0.9	0.84	0.8
3.83	juvenile	1	0.94	0.91
3.75	juvenile	0.9	0.84	0.8
3.1	juvenile	0.93	0.87	0.83
4.18	juvenile	0.89	0.83	0.79
2.15	juvenile	0.92	0.85	0.82
